# Supplementary material for: Transmission of extended-spectrum cephalosporin-resistant Salmonella harboring a blaCMY-2-carrying IncA/C2 plasmid chromosomally integrated by ISEcp1 or IS26 in layer breeding chains in Japan
Source: PubMed Central journal article supplement — J Vet Med Sci. 2021 Jul 16;83(9):1345–55. doi: 10.1292/jvms.21-0085 (PMC8498838; doi:10.1292/jvms.21-0085), 2021-07-16
Supplement: jvms-83-1345-s001.pdf [file jvms-83-1345-s001.pdf]

**Supplementary Table 1.**Primers used for detection and sequence determination of *bla* genes

| <i>bla</i> gene             | Purpose                  | Primer name           | Nucleotide sequence 5'–3'  | Reference  |
|-----------------------------|--------------------------|-----------------------|----------------------------|------------|
| <i>bla</i> <sub>CMY</sub>   | Detection and sequencing | cmy-F                 | GACAGCCTCTTCTCCACA         | 1          |
|                             |                          | cmy-R                 | TGGAACGAAGGCTACGTA         | 1          |
|                             | Sequencing               | CMY2-outF             | GTTACAATGTGTGAGAAGCAGTC    | 2          |
|                             |                          | CMY2-outR             | ATGGGATTTTCCTTGCTGTA       | 2          |
|                             |                          | CMY2-R0               | CAGTATTTCGTGACCGGA         | 2          |
| CMY2-F3                     | CTGGATTACGGTTCCGCA       | 2                     |                            |            |
| <i>bla</i> <sub>CTX-M</sub> | Detection and sequencing | CTX-MU1               | ATGTGCAGYACCAGTAARGT       | 3          |
|                             |                          | CTX-MU2               | TGGGTRAARTARGTSACCAGA      | 3          |
|                             | Sequencing               | CTXM14 upstream F1    | AGCAGTCTAAATTCCTCGTG       | This study |
|                             |                          | CTXM14 upstream R3    | GCTGGCAATCAATTTGTTT        | This study |
|                             |                          | CTX-outF2             | GCCAAGGATAATACTAATAGAGG    | 2          |
|                             |                          | CTX-outR              | GCGGAATGATAGAAAGAGATGAG    | 2          |
|                             |                          | CTX-M-14 F653         | ACGTGGCTCAAAGCAATAC        | 4          |
|                             |                          | CTX-M-14 R1070        | CGTGAAGAAGGTGTGCTGA        | 4          |
|                             | Detection                | Mab/F                 | GGGGAGCTCATAAAATCTTGAAGAC  | 5          |
|                             |                          | Mab/R                 | GGGGATCCCTTACCAATGCTTAATCA | 5          |
| Sequencing                  | TEM-1R ant               | TGATTGCTGGTTACGGTGA   | This study                 |            |
|                             | TEM-1R upstream          | GGTTAGCTCCTTCGGTCCTC  | This study                 |            |
|                             | TEM1F downstream         | GGATGGAGGCGGATAAAGTT  | This study                 |            |
|                             | TEM-1F Tn3 rec           | ACGAAAGGGCCTCGTGATA   | This study                 |            |
|                             | TEM-1 seq OutF           | ATGGTTTCTTAGACGTCAGG  | This study                 |            |
|                             | TEM-1 seq OutR           | CATAAACAAAGCGTCTTGAAC | This study                 |            |
| <i>bla</i> <sub>SHV</sub>   | Detection                | SHV-F                 | AGGATTGACTGCCTTTTGG        | 6          |
|                             |                          | SHV-R                 | ATTTGCTGATTCGCTCG          | 6          |

**References**

- Zhao, S., Qaiyumi, S., Friedman, S., Singh, R., Foley, S. L., White, D. G., McDermott, P. F., Donkar, T., Bolin, C., Munro, S., Baron, E. J. and Walker, R. D. 2003. Characterization of *Salmonella enterica* serotype Newport isolated from humans and food animals. *J. Clin. Microbiol.* **41**: 5366–5371.
- Noda, T., Murakami, K., Etoh, Y., Okamoto, F., Yatsuyanagi, J., Sera, N., Furuta, M., Onozuka, D., Oda, T., Asai, T. and Fujimoto, S. 2015. Increase in resistance to extended-spectrum cephalosporins in *Salmonella* isolated from retail chicken products in Japan. *PLoS One* **10**: e0116927.
- Pagani, L., Dell'Amico, E., Migliavacca, R., D'Andrea, M. M., Giacobone, E., Amicosante, G., Romero, E. and Rossolini, G. M. 2003. Multiple CTX-M-type extended-spectrum  $\beta$ -lactamases in nosocomial isolates of *Enterobacteriaceae* from a hospital in northern Italy. *J. Clin. Microbiol.* **41**: 4264–4269.
- Shigemura, H., Sakatsume, E., Sekizuka, T., Yokoyama, H., Hamada, K., Etoh, Y., Carle, Y., Mizumoto, S., Hirai, S., Matsui, M., Kimura, H., Suzuki, M., Onozuka, D., Kuroda, M., Inoshima, Y. and Murakami, K. 2020. Food workers as a reservoir of extended-spectrum-cephalosporin-resistant *Salmonella* strains in Japan. *Appl. Environ. Microbiol.* **86**: e00072-20.
- Perilli, M., Dell'Amico, E., Segatore, B., de Massis, M. R., Bianchi, C., Luzzaro, F., Rossolini, G. M., Toniolo, A., Nicoletti, G. and Amicosante, G. 2002. Molecular characterization of extended-spectrum  $\beta$ -lactamases produced by nosocomial isolates of *Enterobacteriaceae* from an Italian nationwide survey. *J. Clin. Microbiol.* **40**: 611–614.
- Colom, K., Pérez, J., Alonso, R., Fernández-Aranguiz, A., Lariño, E. and Cisterna, R. 2003. Simple and reliable multiplex PCR assay for detection of *bla*<sub>TEM</sub>, *bla*<sub>SHV</sub> and *bla*<sub>OXA-1</sub> genes in Enterobacteriaceae. *FEMS Microbiol. Lett.* **223**: 147–151.

**Supplementary Table 2.**Epidemiological information about the *bla* gene-carrying *Salmonella* isolates from this study

| Serotype               | <i>bla</i> gene                | Location of samples collected | Facility type       | Facility name <sup>a</sup> | Egg production company's name | Sample origin | Isolation date | Strain name                   |
|------------------------|--------------------------------|-------------------------------|---------------------|----------------------------|-------------------------------|---------------|----------------|-------------------------------|
| Ohio <sup>b</sup>      | <i>bla</i> <sub>CMY-2</sub>    | Prefecture A                  | Layer farm          | a5                         | Company A                     | Eggshell      | January 2012   | <b>SEOhiM1960<sup>c</sup></b> |
|                        |                                |                               | Pullet-rearing farm | Uncertain A <sup>d</sup>   | Company A                     | Environment   | July 2009      | SEOhiM1505                    |
|                        |                                |                               | Pullet-rearing farm | a7                         | Company A                     | Environment   | November 2009  | SEOhiM1579                    |
|                        |                                |                               | Pullet-rearing farm | a1                         | Company A                     | Environment   | January 2010   | <b>SEOhiM1593<sup>c</sup></b> |
|                        |                                |                               |                     |                            |                               |               | May 2010       | SEOhiM1615                    |
|                        |                                |                               |                     |                            |                               |               | October 2010   | SEOhiM1668-2                  |
|                        |                                |                               |                     |                            |                               |               | November 2010  | SEOhiM1782                    |
|                        |                                |                               |                     |                            |                               |               | April 2011     | SEOhiM1798                    |
|                        |                                |                               |                     |                            |                               |               | May 2011       | SEOhiM1802                    |
|                        |                                |                               |                     |                            |                               |               | July 2011      | SEOhiM1822                    |
|                        |                                |                               |                     | March 2012                 | SEOhiM1984                    |               |                |                               |
|                        |                                |                               |                     | June 2012                  | <b>SEOhiM2008<sup>c</sup></b> |               |                |                               |
| Untypeable with O7:b:- | <i>bla</i> <sub>CMY-2</sub>    | Prefecture A                  | Pullet-rearing farm | a1                         | Company A                     | Environment   | February 2012  | SEOhiM1977                    |
| Braenderup             | <i>bla</i> <sub>CMY-2</sub>    | Prefecture B                  | Layer farm          | Uncertain B <sup>e</sup>   | Company B                     | Environment   | October 2011   | SEBraM1898                    |
| Cerro                  | <i>bla</i> <sub>CTX-M-14</sub> | Prefecture C                  | Layer farm          | q1                         | Company Q                     | Eggshell      | August 2012    | <b>SECerM2017<sup>c</sup></b> |

<sup>a</sup> Each facility belonged to egg production companies A, B, or Q.<sup>b</sup> *Salmonella enterica* subsp. *enterica* serovar Ohio.<sup>c</sup> Detailed information about the four strains appearing in bold type is shown in Table 3.<sup>d</sup> Uncertain A must either be facility a1, a6, or a7 in egg production company A.<sup>e</sup> Uncertain B must be one of the 12 facilities belonging to egg production company B.

**Supplementary Table 3.**Comparison of the *bla*<sub>CMY-2</sub>-harboring-IncA/C<sub>2</sub> plasmids isolated from *Salmonella enterica* in this study with IncA/C<sub>2</sub> plasmids from Enterobacteriaceae<sup>a</sup>

| Plasmid name  | Plasmid replicon type | Antimicrobial resistance genes               |                                                                                   |                                                                                                   | Number of IS26 elements | Number of <i>ISEcp1</i> elements within the region flanking the <i>bla</i> gene <sup>b</sup> | Size (bp) | Isolation year        | Country | Source                          | Accession number | Bacteria                                      | Reference  |
|---------------|-----------------------|----------------------------------------------|-----------------------------------------------------------------------------------|---------------------------------------------------------------------------------------------------|-------------------------|----------------------------------------------------------------------------------------------|-----------|-----------------------|---------|---------------------------------|------------------|-----------------------------------------------|------------|
|               |                       | <i>bla</i> <sub>CMY-2</sub>                  | Common antimicrobial resistance genes                                             | Other antimicrobial resistance genes                                                              |                         |                                                                                              |           |                       |         |                                 |                  |                                               |            |
| pSEOhiM1593a  | IncA/C <sub>2</sub>   | <i>bla</i> <sub>CMY-2</sub>                  | <i>aph(3'')-Ib</i> , <i>aph(6)-Id</i> , <i>floR</i> , <i>sul2</i> , <i>tet(A)</i> | ND <sup>c</sup>                                                                                   | 3                       | 1                                                                                            | 92,251    | 2010                  | Japan   | Pullet-rearing farm environment | AP024348         | <i>Salmonella enterica</i> serovar Ohio       | This study |
| pSEOhiM1960a  | IncA/C <sub>2</sub>   | <i>bla</i> <sub>CMY-2</sub>                  | <i>aph(3'')-Ib</i> , <i>aph(6)-Id</i> , <i>floR</i> , <i>sul2</i> , <i>tet(A)</i> | ND                                                                                                | 3                       | 1                                                                                            | 92,095    | 2012                  | Japan   | Egg shells                      | AP024350         | <i>Salmonella enterica</i> serovar Ohio       | This study |
| pCVM21550     | IncA/C <sub>2</sub>   | <i>bla</i> <sub>CMY-2</sub>                  | <i>aph(3'')-Ib</i> , <i>aph(6)-Id</i> , <i>floR</i> , <i>sul2</i> , <i>tet(A)</i> | ND                                                                                                | 3                       | 1                                                                                            | 120,340   | Uncertain             | USA     | Swine                           | CP009564         | <i>Salmonella enterica</i> serovar Newport    | [1]        |
| p2016K-0796   | IncA/C <sub>2</sub>   | <i>bla</i> <sub>CMY-2</sub>                  | <i>aph(3'')-Ib</i> , <i>aph(6)-Id</i> , <i>floR</i> , <i>sul2</i> , <i>tet(A)</i> | <i>aph(3')-Ia</i> , <i>sul1</i> , <i>tet(B)</i> , <i>tet(O)</i>                                   | 5                       | 1                                                                                            | 179,850   | Uncertain (2015–2017) | USA     | Human                           | MH760469         | <i>Salmonella enterica</i> serovar Heidelberg | [6]        |
| pAR060302     | IncA/C <sub>2</sub>   | <i>bla</i> <sub>CMY-2</sub>                  | <i>aph(3'')-Ib</i> , <i>aph(6)-Id</i> , <i>floR</i> , <i>sul2</i> , <i>tet(A)</i> | <i>aac(3)-VIa</i> , <i>ant(3'')-Ia</i> , <i>sul1</i>                                              | 3                       | 1                                                                                            | 166,530   | 2002                  | USA     | Cow                             | HQ023864         | <i>Escherichia coli</i>                       | [3]        |
| pYDC637       | IncA/C <sub>2</sub>   | <i>bla</i> <sub>CMY-2</sub>                  | <i>aph(3'')-Ib</i> , <i>aph(6)-Id</i> , <i>floR</i> , <i>sul2</i> , <i>tet(A)</i> | <i>aadA5</i> , <i>ant(3'')-Ia</i> , <i>aph(3')-Ia</i> , <i>dfrA17</i> , <i>rmtE</i> , <i>sul1</i> | 3                       | 1                                                                                            | 199,469   | 2013                  | USA     | Human                           | KP056256         | <i>Escherichia coli</i>                       | [4]        |
| pKP-Gr642     | IncA/C <sub>2</sub>   | Not detected but <i>bla</i> <sub>CMY-4</sub> | <i>aph(3'')-Ib</i> , <i>aph(6)-Id</i> , <i>floR</i> , <i>sul2</i> , <i>tet(A)</i> | <i>aac(6)-II</i> , <i>aadA1</i> , <i>bla</i> <sub>NIM-19</sub> , <i>dfrA1</i>                     | 2                       | 1                                                                                            | 162,787   | 2011                  | Greece  | Human                           | KR559888         | <i>Klebsiella pneumoniae</i>                  | [5]        |
| p205880-Ct1/2 | IncA/C <sub>2</sub>   | <i>bla</i> <sub>CMY-2</sub>                  | <i>aph(3'')-Ib</i> , <i>aph(6)-Id</i> , <i>floR</i> , <i>sul2</i> , <i>tet(A)</i> | <i>aac(6)-II</i> , <i>sul1</i>                                                                    | 3                       | 1                                                                                            | 153,373   | 2012                  | China   | Human                           | MF344573         | <i>Klebsiella pneumoniae</i>                  | [2]        |
| pSN254b       | IncA/C <sub>2</sub>   | <i>bla</i> <sub>CMY-2</sub>                  | <i>aph(3'')-Ib</i> , <i>aph(6)-Id</i> , <i>floR</i> , <i>sul2</i> , <i>tet(A)</i> | <i>aadA7</i> , <i>sul1</i>                                                                        | 2                       | 1                                                                                            | 152,216   | Uncertain             | Canada  | Uncertain                       | KJ909290         | <i>Aeromonas salmonicida</i>                  | [7]        |

<sup>a</sup> Plasmids with >99% query coverage against pSEOhiM1593a nucleotide sequences were identified by BLASTN searches in this list.<sup>b</sup> Number of *ISEcp1* elements within 5,000 bp of the *bla* gene.<sup>c</sup> ND: no antimicrobial resistance gene was detected.

## References

1. Cao, G., Allard, M. W., Hoffmann, M., Monday, S. R., Muruvanda, T., Luo, Y., Payne, J., Rump, L., Meng, K., Zhao, S., McDermott, P. F., Brown, E. W. and Meng, J. 2015. Complete sequences of six IncA/C plasmids of multidrug-resistant *Salmonella enterica* subsp. *enterica* serotype Newport. *Genome Announc* **3**: e00027-15.
2. Cheng, Q., Jiang, X., Xu, Y., Hu, L., Luo, W., Yin, Z., Gao, H., Yang, W., Yang, H., Zhao, Y., Zhao, X., Zhou, D. and Dai, E. 2019. Type 1, 2, and 1/2-hybrid IncC plasmids from China. *Front Microbiol* **10**: 2508.
3. Fernández-Alarcón, C., Singer, R. S. and Johnson, T. J. 2011. Comparative genomics of multidrug resistance-encoding IncA/C plasmids from commensal and pathogenic *Escherichia coli* from multiple animal sources. *PLoS One* **6**: e23415.
4. Lee, C. S., Li, J. J. and Doi, Y. 2015. Complete sequence of conjugative IncA/C plasmid encoding CMY-2  $\beta$ -lactamase and RmtE 16S rRNA methyltransferase. *Antimicrob Agents Chemother* **59**: 4360–4361.
5. Papagiannitsis, C. C., Dolejska, M., Izdebski, R., Giakkoupi, P., Skálová, A., Chudějová, K., Dobiasova, H., Vatopoulos, A. C., Derde, L. P., Bonten, M. J., Gniadkowski, M. and Hrabák, J. 2016. Characterisation of IncA/C<sub>2</sub> plasmids carrying an *In416*-like integron with the *bla*<sub>VIM-19</sub> gene from *Klebsiella pneumoniae* ST383 of Greek origin. *Int J Antimicrob Agents* **47**: 158–162.
6. Tagg, K. A., Francois Watkins, L., Moore, M. D., Bennett, C., Joung, Y. J., Chen, J. C. and Folster, J. P. 2019. Novel trimethoprim resistance gene *dfi:A34* identified in *Salmonella* Heidelberg in the USA. *J Antimicrob Chemother* **74**: 38–41.
7. Vincent, A. T., Trudel, M. V., Paquet, V. E., Boyle, B., Tanaka, K. H., Dallaire-Dufresne, S., Daher, R. K., Frenette, M., Derome, N. and Charette, S. J. 2014. Detection of variants of the pRAS3, pAB5S9, and pSN254 plasmids in *Aeromonas salmonicida* subsp. *salmonicida*: multidrug resistance, interspecies exchanges, and plasmid reshaping. *Antimicrob Agents Chemother* **58**: 7367–7374.

**Supplementary Table 4.**  
*Salmonella* serotypes from eggshells and egg production environments

| O-group                               | Serotypes                                    | Number of isolates |
|---------------------------------------|----------------------------------------------|--------------------|
| O:4 (B)                               | Agona <sup>a</sup>                           | 9                  |
|                                       | Typhimurium                                  | 3                  |
| O:7 (C <sub>1</sub> )                 | Braenderup <sup>b</sup>                      | 36                 |
|                                       | Infantis                                     | 22                 |
|                                       | Ohio <sup>b</sup>                            | 22                 |
|                                       | Mbandaka                                     | 10                 |
|                                       | Thompson                                     | 8                  |
|                                       | Montevideo                                   | 6                  |
|                                       | Livingston                                   | 4                  |
|                                       | Singapore                                    | 4                  |
|                                       | Othmarschen                                  | 3                  |
|                                       | Bareilly                                     | 2                  |
|                                       | Tennessee                                    | 2                  |
|                                       | Untypeable with O7: b: - <sup>b</sup>        | 1                  |
| O:8 (C <sub>2</sub> -C <sub>3</sub> ) | Corvallis                                    | 15                 |
|                                       | Newport                                      | 5                  |
|                                       | Kentucky                                     | 4                  |
|                                       | Manhattan                                    | 2                  |
| O:9 (D <sub>1</sub> )                 | Enteritidis                                  | 5                  |
| O:3,10 (E <sub>1</sub> )              | Orion                                        | 3                  |
| O:13 (G)                              | Untypeable with O13: y: -                    | 2                  |
| O:18 (K)                              | Cerro <sup>c</sup>                           | 20                 |
| O:35 (O)                              | Alachua                                      | 21                 |
| O:40 (R)                              | Johannesburg                                 | 3                  |
|                                       | Others (including 12 serotypes) <sup>d</sup> | 12                 |
|                                       | Total                                        | 224                |

<sup>a</sup> *Salmonella enterica* subsp. *enterica* serovar Agona.

<sup>b</sup> Including AmpC  $\beta$ -lactamase producers.

<sup>c</sup> Including an extended-spectrum  $\beta$ -lactamase producer.

<sup>d</sup> Including Chincol, Gaminara, Havana, Idikan, Oranienburg, Potsdam, Putten, Rissen, Schwarzengrund, Senftenberg, Virchow, and O16: l, v: -.

**Supplementary Table 5.**

Antimicrobial resistance rates of *Salmonella* isolates<sup>a</sup> originating from Japanese layer breeding chains and egg processing facilities.

| Antimicrobial   | Number of resistant isolates | Resistance rate <sup>b</sup> (%) |
|-----------------|------------------------------|----------------------------------|
| Streptomycin    | 30                           | 13.4                             |
| Tetracycline    | 26                           | 11.6                             |
| Ampicillin      | 20                           | 8.9                              |
| Chloramphenicol | 16                           | 7.1                              |
| Cefpodoxime     | 15                           | 6.7                              |
| Nalidixic acid  | 6                            | 2.7                              |
| Ciprofloxacin   | 4                            | 1.8                              |
| Kanamycin       | 1                            | 0.4                              |
| Azithromycin    | 0                            | 0                                |
| Meropenem       | 0                            | 0                                |

<sup>a</sup> Of the 224 *Salmonella* isolates tested, 40 showed resistance to at least one antimicrobial agent.

<sup>b</sup> The resistance rate for each antimicrobial agent was calculated as the percentage of resistant isolates among 224 isolates in this study.

**Supplementary Table 6.**Determination of minimum inhibitory concentration (MIC) for *Salmonella enterica* using Etest<sup>a</sup>

| Strains    | Serovars                    | Location of <i>bla</i> genes | <i>bla</i> genes               | MIC ( $\mu$ g/ml) of each antimicrobial <sup>b</sup> |     |     |       |            |       |
|------------|-----------------------------|------------------------------|--------------------------------|------------------------------------------------------|-----|-----|-------|------------|-------|
|            |                             |                              |                                | CTRX                                                 | CAZ | CTX | CPDX  | ABPC / SBT | ABPC  |
| SEOhM1593  | <i>S.</i> Ohio <sup>c</sup> | Plasmid                      | <i>bla</i> <sub>CMY-2</sub>    | 96                                                   | 48  | >32 | > 256 | 24         | > 256 |
| SEOhM1960  | <i>S.</i> Ohio              | Chromosome and plasmid       | <i>bla</i> <sub>CMY-2</sub>    | 96                                                   | 48  | >32 | > 256 | 48         | > 256 |
| SEOhM2008  | <i>S.</i> Ohio              | Chromosome                   | <i>bla</i> <sub>CMY-2</sub>    | 16                                                   | 12  | 12  | > 256 | 16         | > 256 |
| SECerM2017 | <i>S.</i> Cerro             | Chromosome                   | <i>bla</i> <sub>CTX-M-14</sub> | 16                                                   | 1   | 12  | 64    | 6          | > 256 |

<sup>a</sup> Etest (bioMérieux, Marcy-l'Étoile, France) was used for MIC determination using agar plates.<sup>b</sup> ABPC: ampicillin, ABPC / SBT: ampicillin-sulbactam, CAZ: ceftazidime, CPDX: cefpodoxime, CTRX: ceftriaxone, CTX: cefotaxime.<sup>c</sup> *S. enterica* subsp. *enterica* serovar Ohio.
